# Supplementary material for: How do air ions reflect variations in ionising radiation in the lower atmosphere in a boreal forest?
Source: Copernicus journal article supplement (doi:10.5194/acp-16-14297-2016), 2016-11-16
Supplement: Supplementary file 1 [file acp-16-14297-2016-supplement.pdf]

Supplement of Atmos. Chem. Phys., 16, 14297–14315, 2016  
<http://www.atmos-chem-phys.net/16/14297/2016/>  
doi:10.5194/acp-16-14297-2016-supplement  
© Author(s) 2016. CC Attribution 3.0 License.

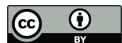

*Supplement of*

## **How do air ions reflect variations in ionising radiation in the lower atmosphere in a boreal forest?**

**Xuemeng Chen et al.**

*Correspondence to:* Xuemeng Chen ([xuemeng.chen@helsinki.fi](mailto:xuemeng.chen@helsinki.fi))

The copyright of individual parts of the supplement might differ from the CC-BY 3.0 licence.

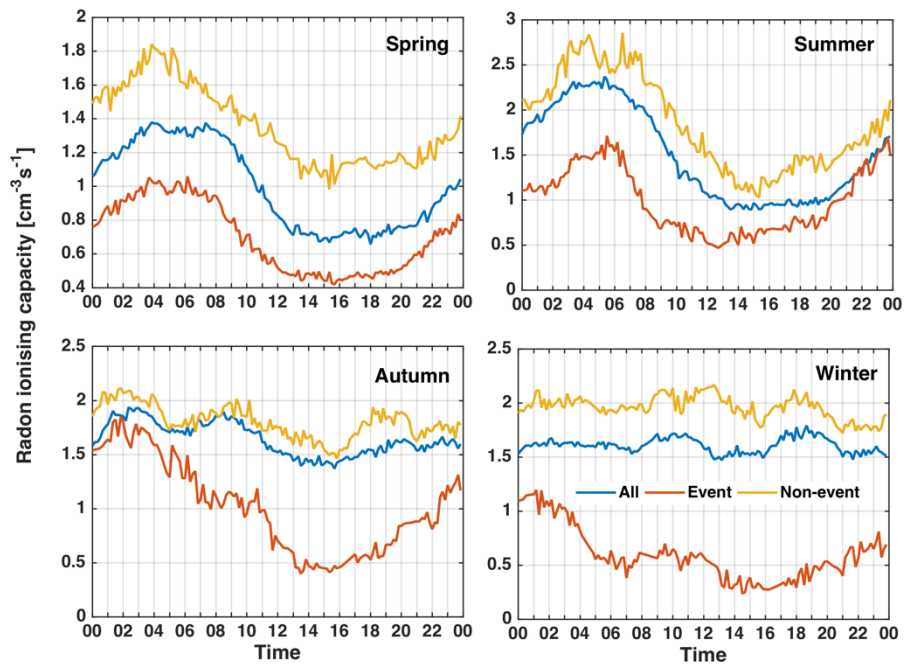

1  
2  
3  
4

Figure S1. 10-min median radon ionising capacities on event and non-event days in different seasons over 2003-2006.

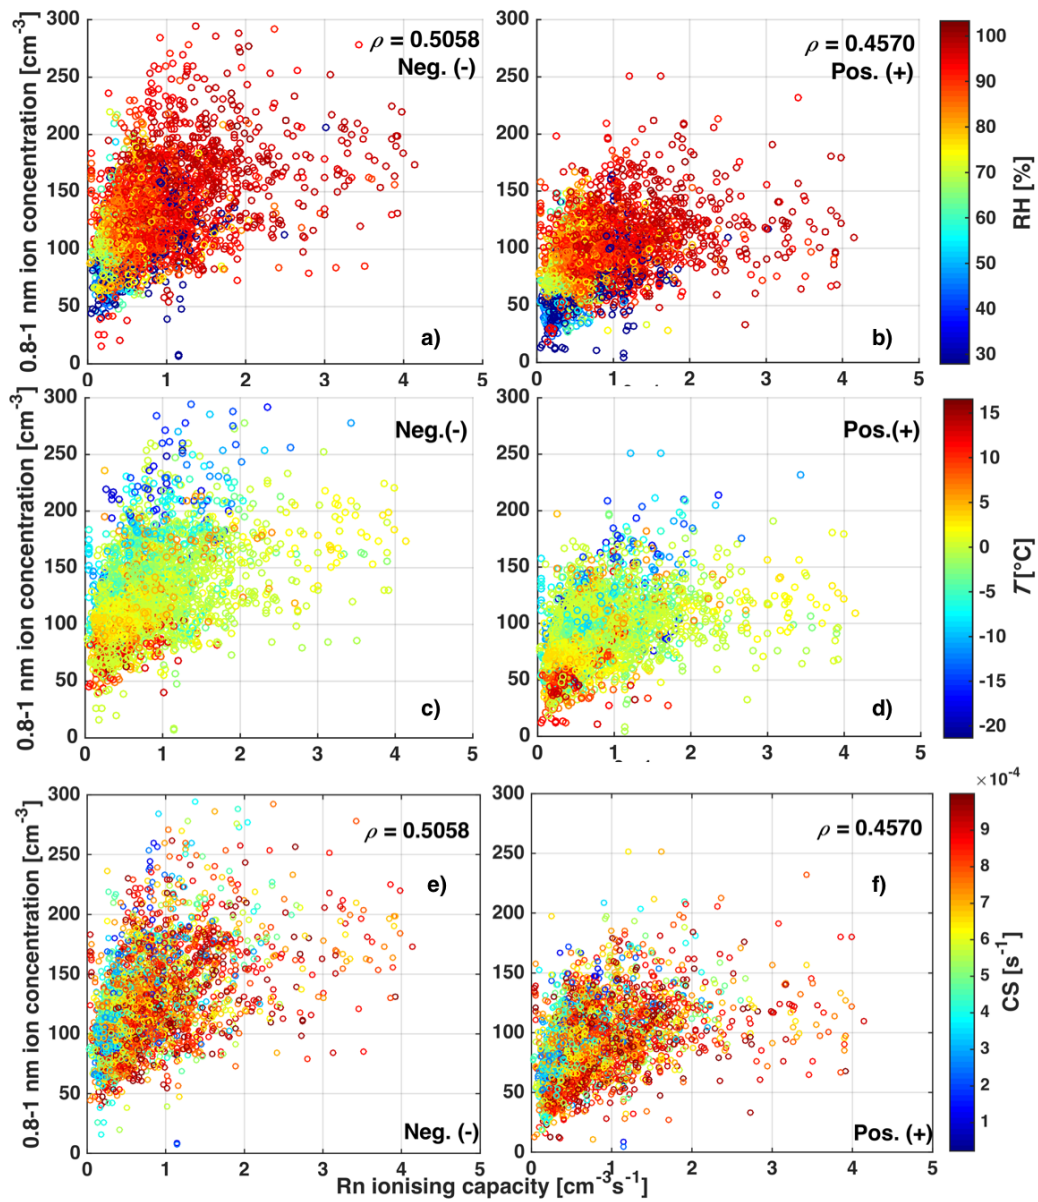

5

6 Figure S2. Relationship between the hourly ionising capacity and the 0.8-1 nm ion concentration with  
 7 Spearman's rank correlation coefficients ( $\rho$ ) when the condensation sink (CS) is below 0.001 s<sup>-1</sup>. Upper  
 8 panel: with relative humidity (RH) on the colour scale. Middle panel: with air temperature ( $T$ ) on the  
 9 colour scale. Lower panel: with condensational sink (CS) on the colour scale.

10

11

12

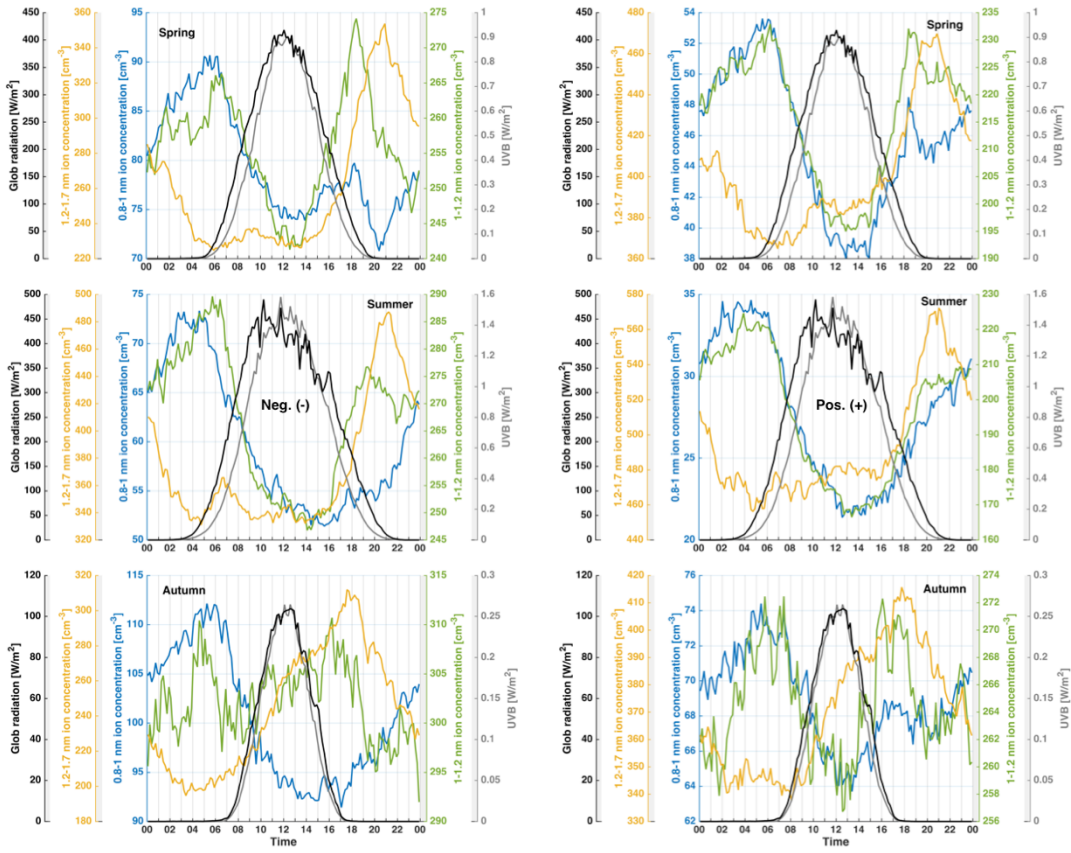

13

14 Figure S3. Diurnal relationship between median solar radiation intensities and ion concentrations in 0.8-  
15 1 nm, 1-1.2 nm and 1.2-1.7 nm sub-cluster size ranges in different seasons over 2003-2006.

16

17

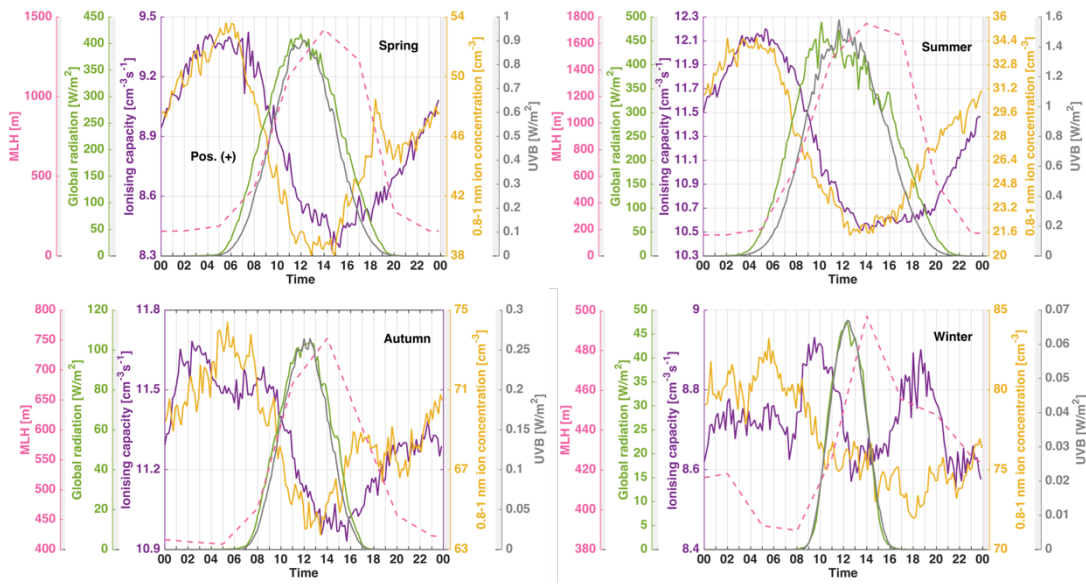

18

19 Figure S4. Diurnal patterns in median 0.8-1 nm positive ion concentrations, ionising capacities, global  
 20 and UVB radiation intensities as well as modelled mixing layer heights (MLH) in different seasons over  
 21 2003-2006.

22
